# Supplementary material for: Exploiting the Electronic Tuneability of Carboranes as Supports for Frustrated Lewis Pairs
Source: MDPI journal article supplement (doi:10.3390/molecules23123099), 2018-11-27
Supplement: s1 [file s1]

## **Exploiting the Electronic Tuneability of Carborans as Supports for Frustrated Lewis Pairs**

Amanda Benton, Zachariah Copeland, Stephen M. Mansell, Georgina M. Rosair and Alan J. Welch

### **Supplementary Material**

#### **1. NMR and Mass Spectra of New Compounds**

**Figure S1:**  $^{11}\text{B}\{^1\text{H}\}$  NMR spectrum of compound **1** in  $\text{C}_6\text{D}_6$

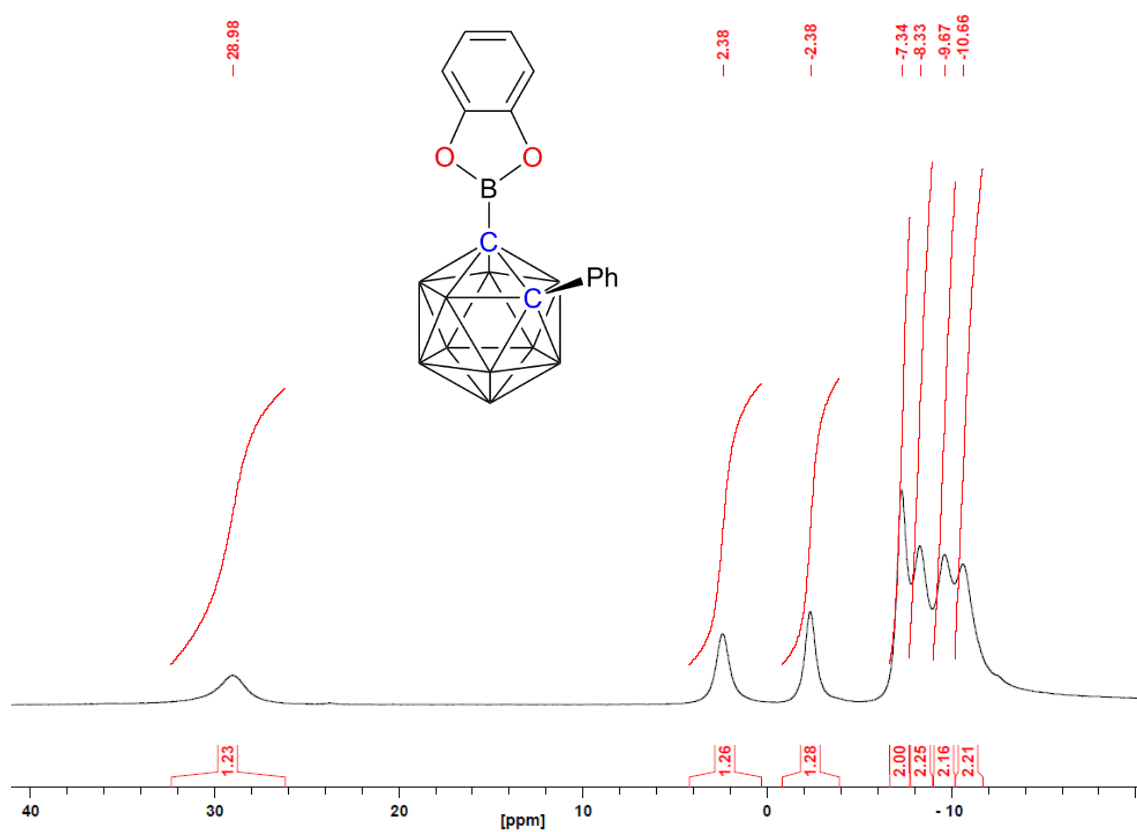

**Figure S2:**  $^{11}\text{B}$  NMR spectrum of compound **1** in  $\text{C}_6\text{D}_6$

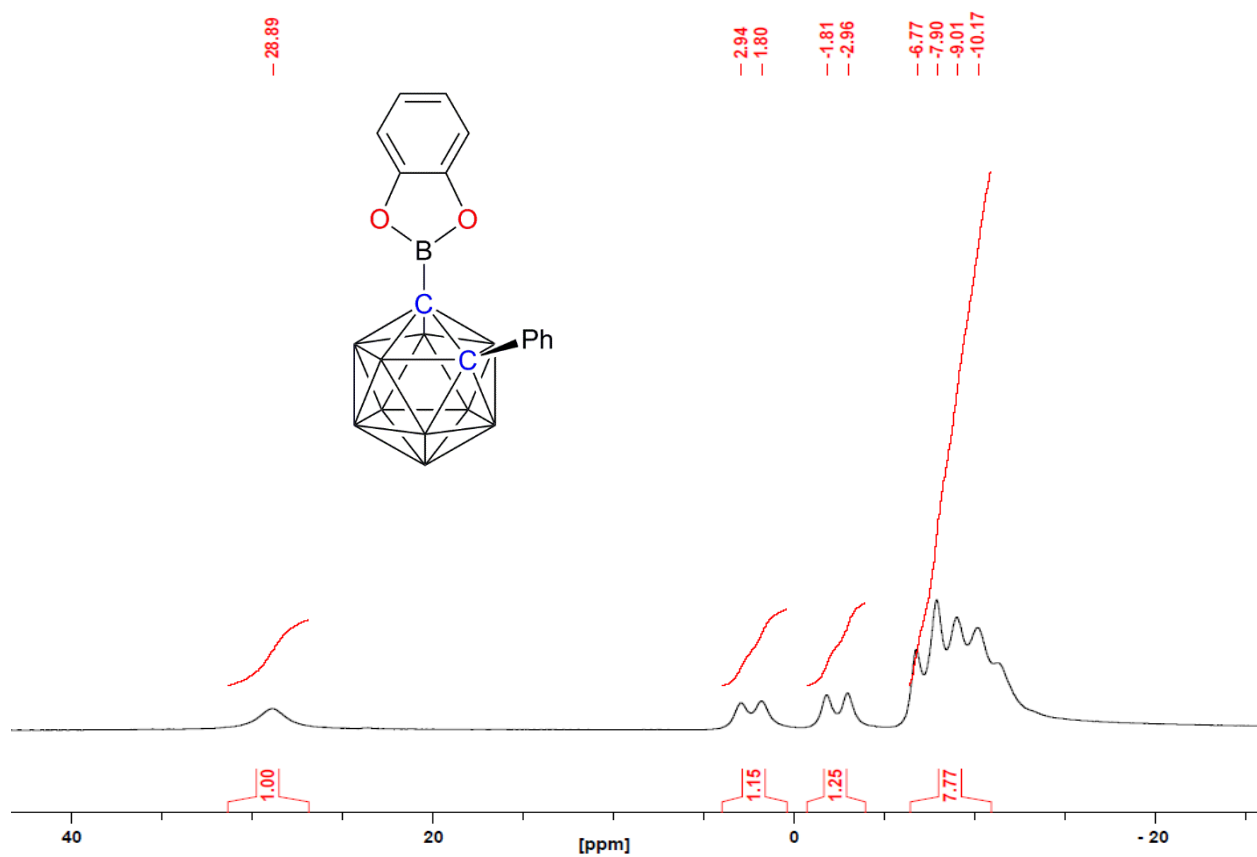

**Figure S3:**  $^1\text{H}$  NMR spectrum (between  $\delta$  8-6 ppm) of compound **1** in  $\text{C}_6\text{D}_6$

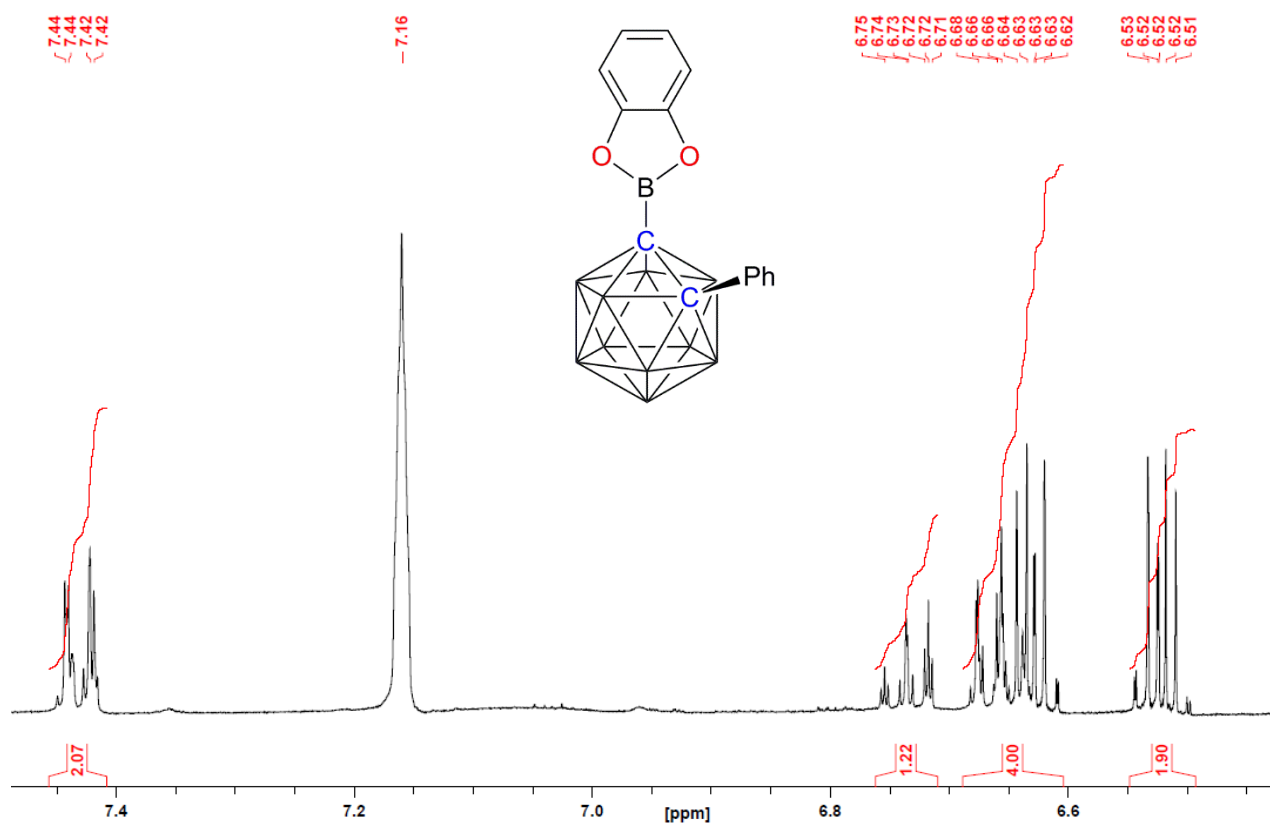

**Figure S4:**  $^1\text{H}$  NMR spectrum (between  $\delta$  8.5-1 ppm) of compound **1** in  $\text{C}_6\text{D}_6$

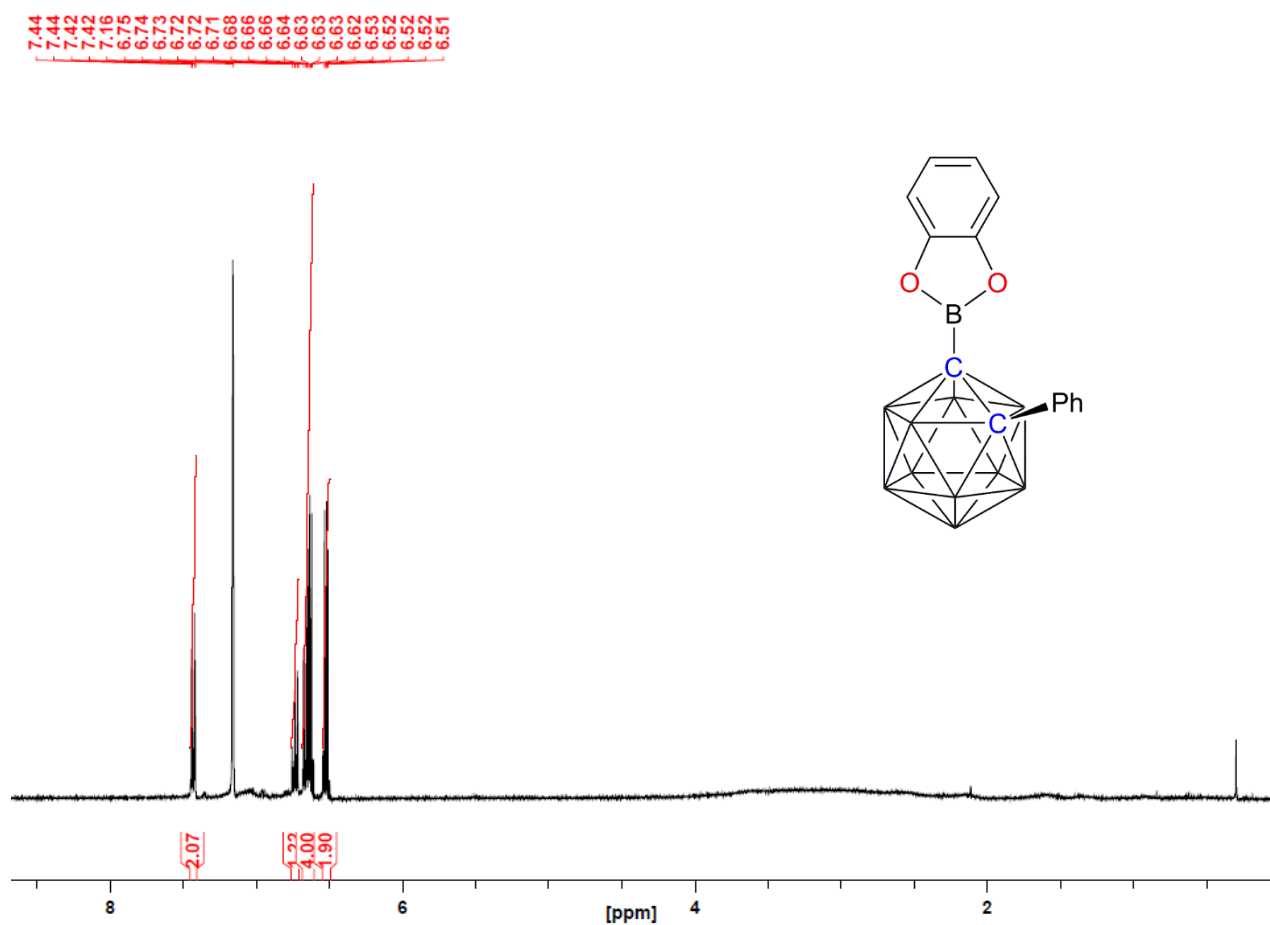

**Figure S5:** EI mass spectrum of compound **1**

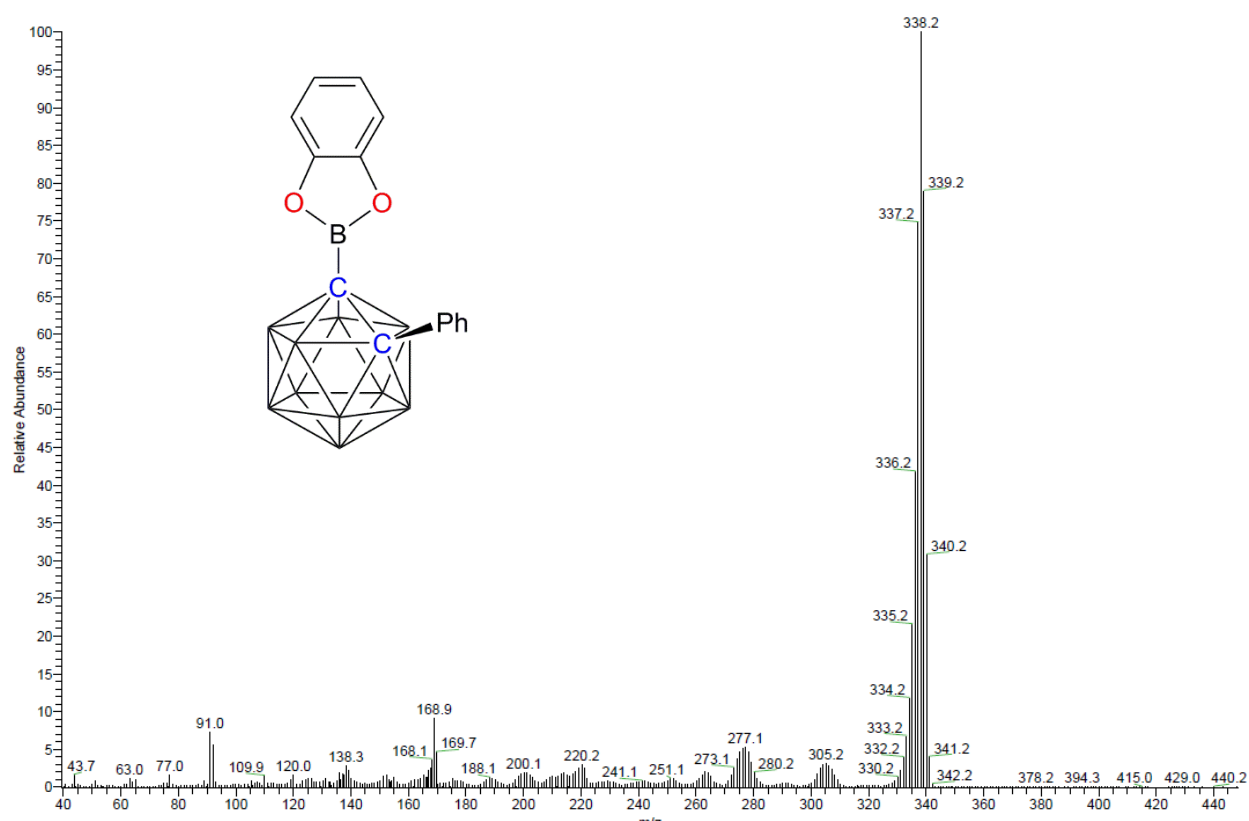

**Figure S6:**  $^{11}\text{B}\{^1\text{H}\}$  NMR spectrum of compound **2** in  $\text{CDCl}_3$

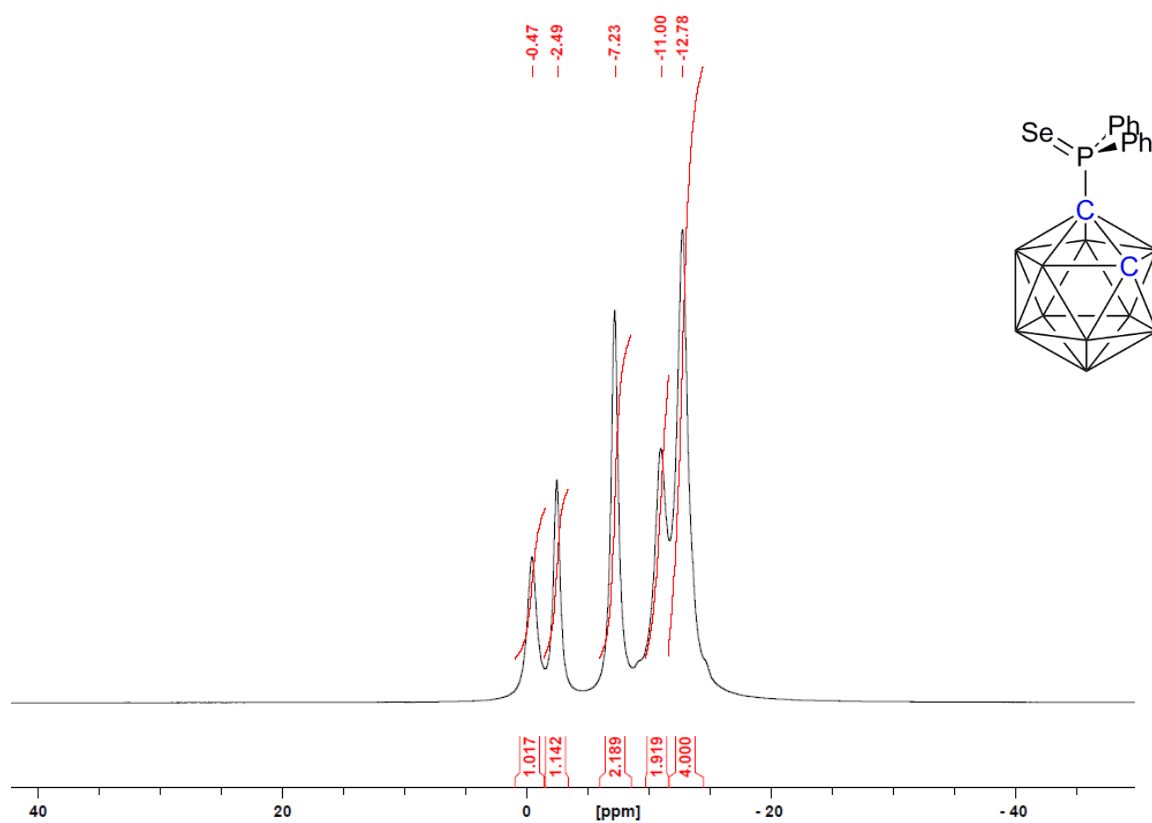

**Figure S7:**  $^{11}\text{B}$  NMR spectrum of compound **2** in  $\text{CDCl}_3$

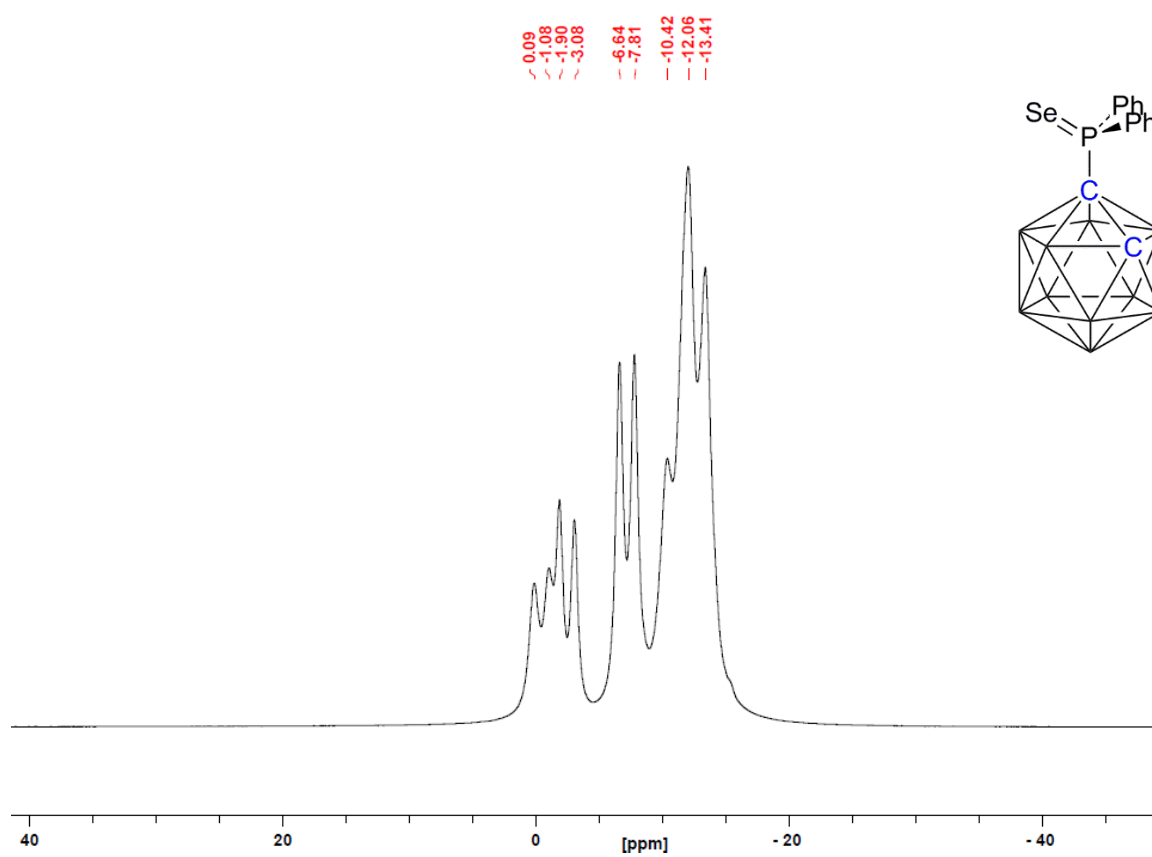

**Figure S8:**  $^1\text{H}$  NMR spectrum (between  $\delta$  9-5.1 ppm) of compound **2** in  $\text{CDCl}_3$

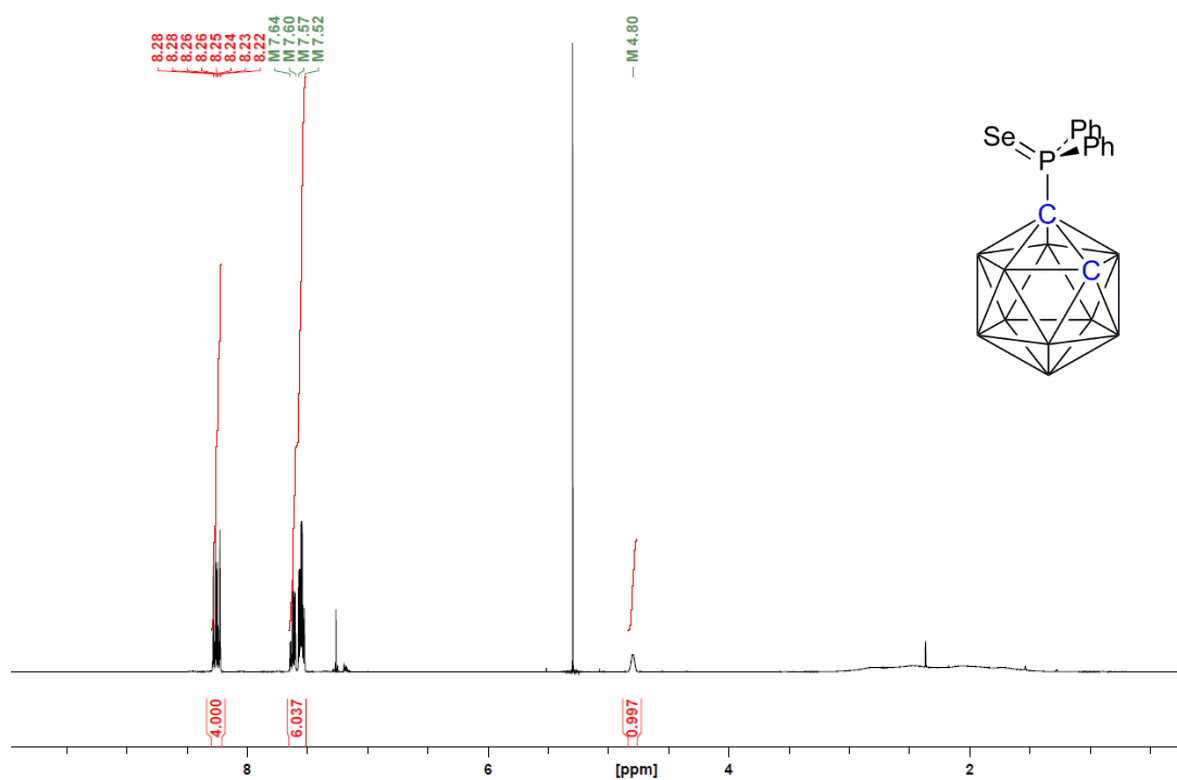

**Figure S9:**  $^1\text{H}$  NMR spectrum (between  $\delta$  8.5-7.4 ppm) of compound **2** in  $\text{CDCl}_3$

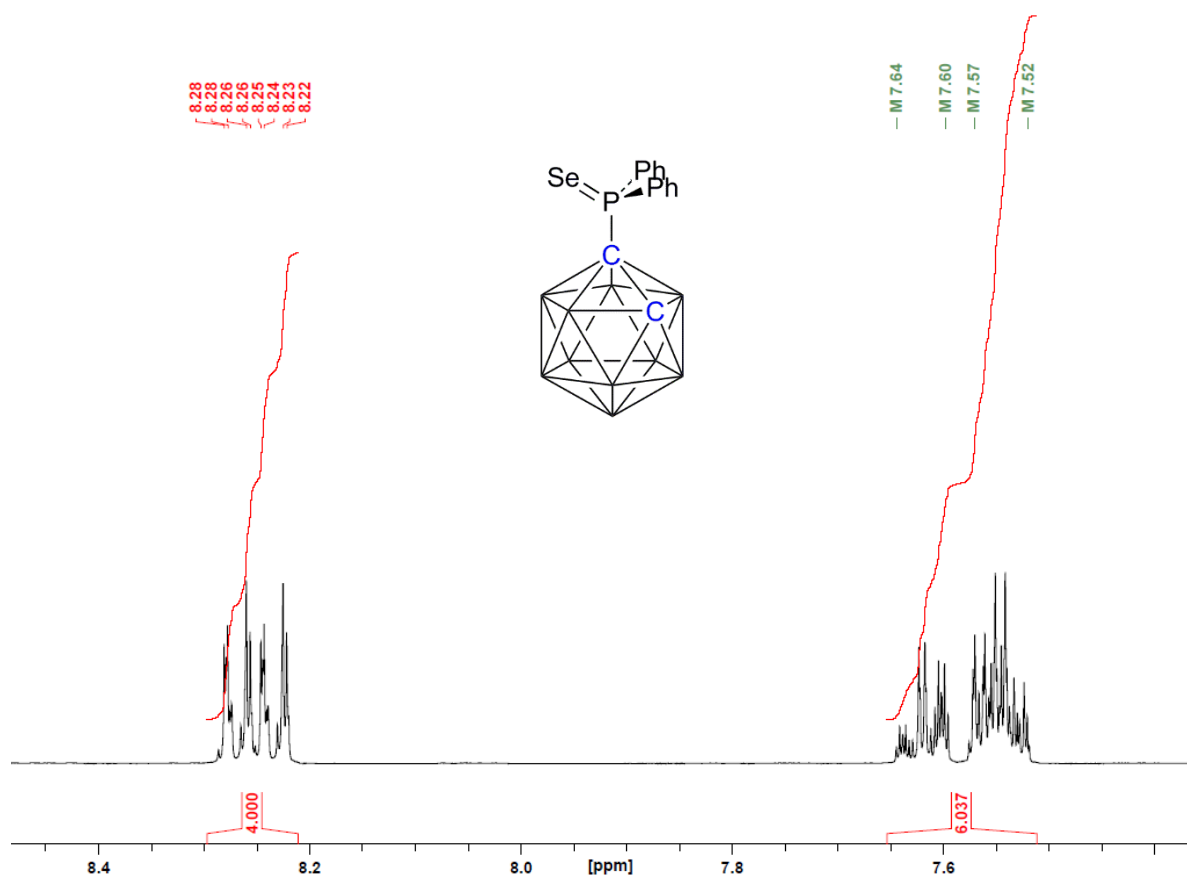

**Figure S10:**  $^{31}\text{P}\{^1\text{H}\}$  NMR spectrum of compound **2** in  $\text{CDCl}_3$

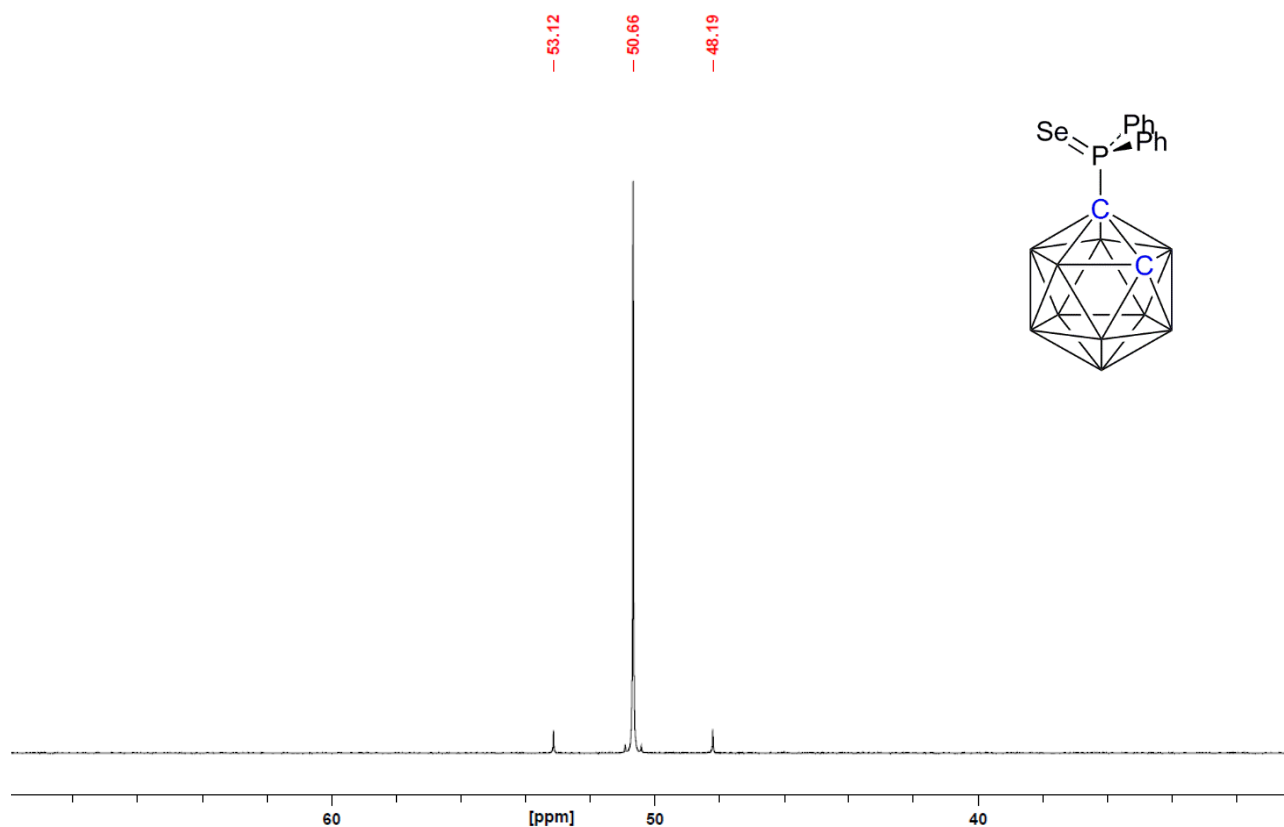

**Figure S11:** EI mass spectrum of compound **2**

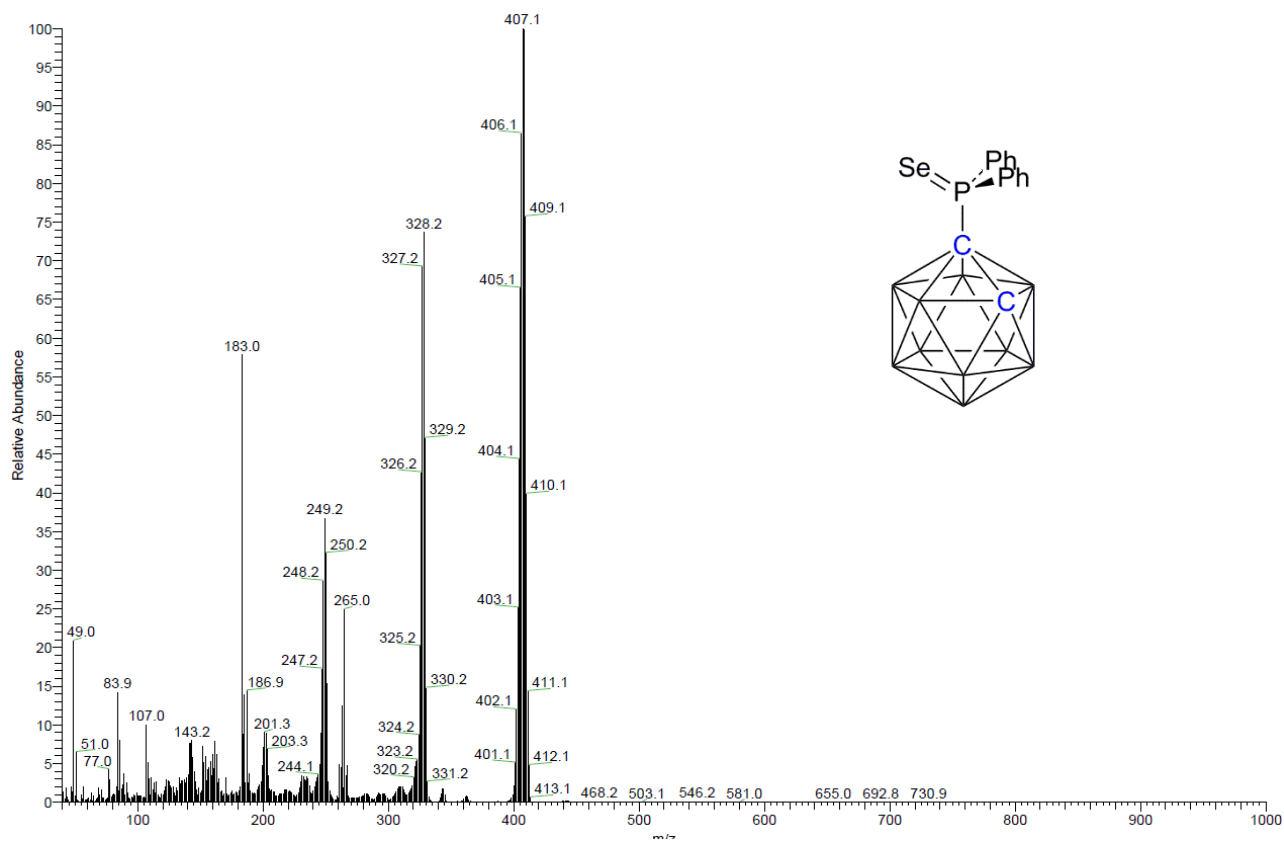

**Figure S12:**  $^{11}\text{B}\{^1\text{H}\}$  NMR spectrum of compound **3** in  $\text{C}_6\text{D}_6$

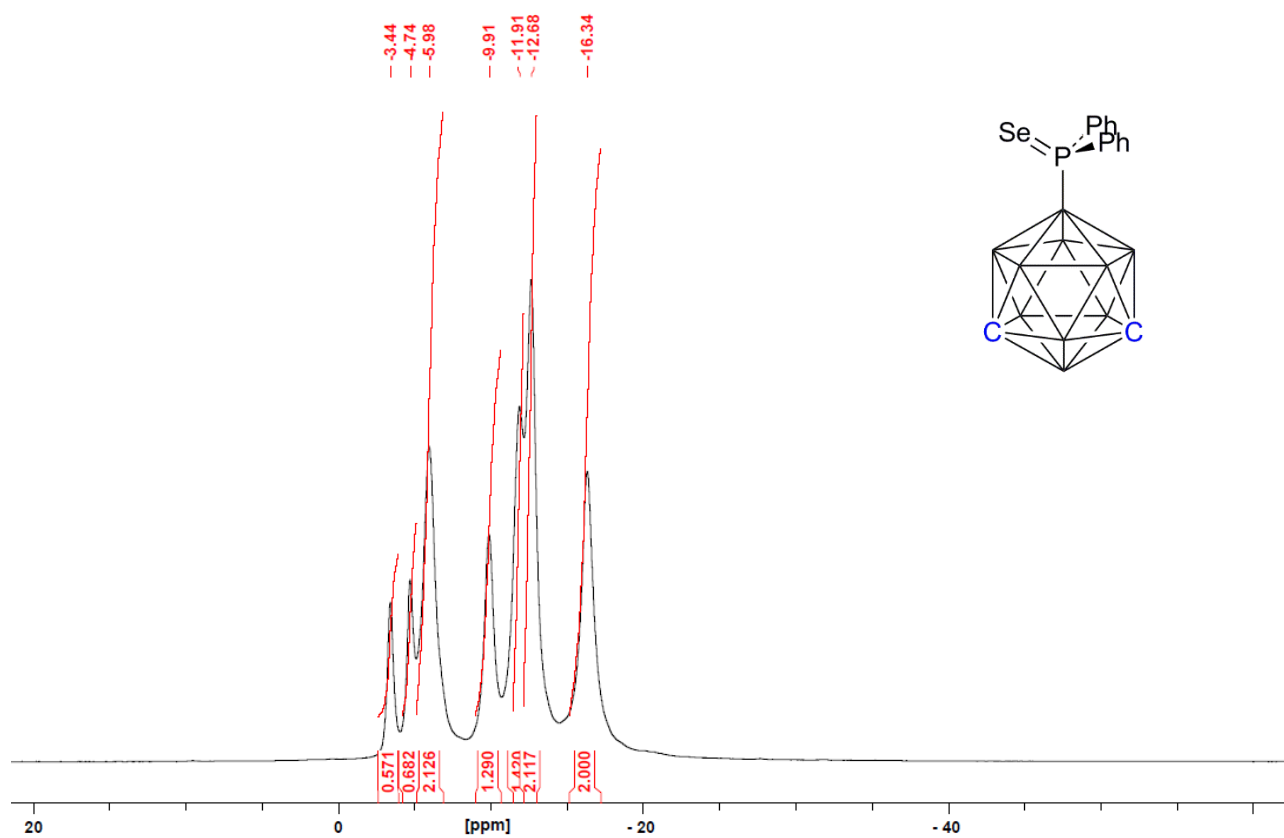

**Figure S13:**  $^{11}\text{B}$  NMR spectrum of compound **3** in  $\text{C}_6\text{D}_6$

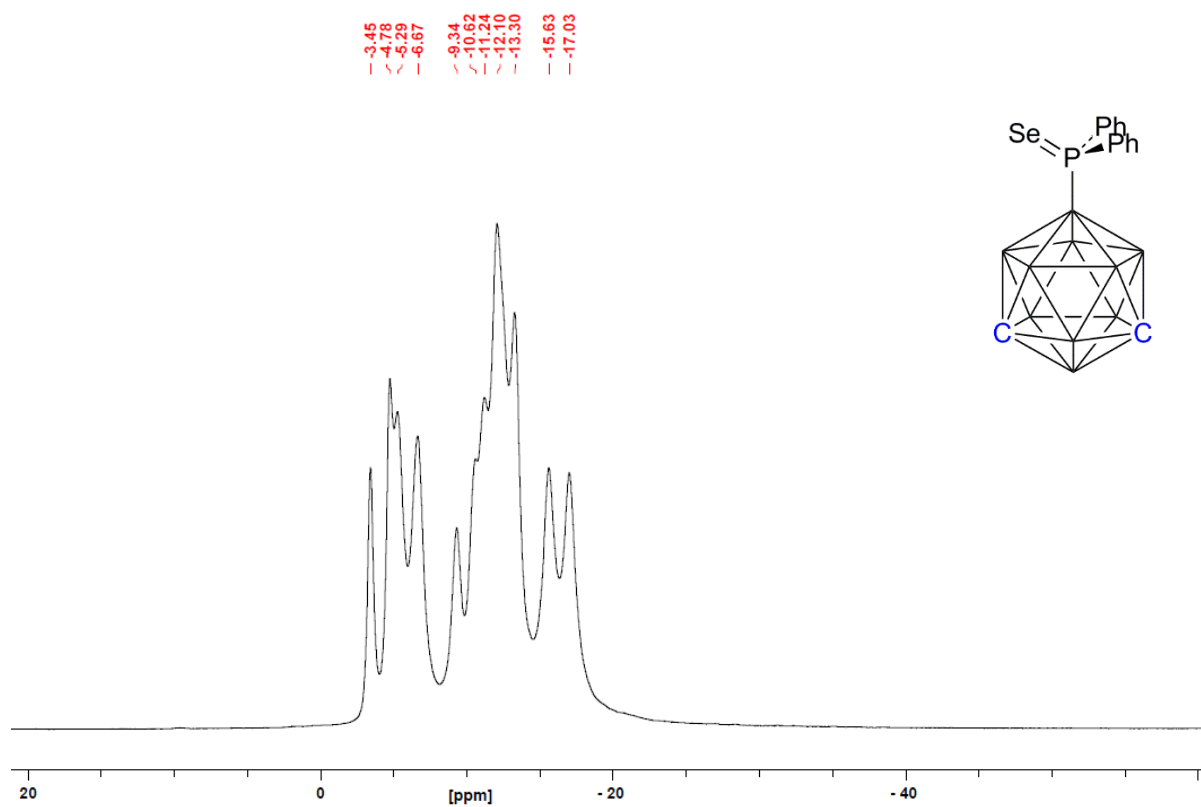



**Figure S14:**  $^1\text{H}$  NMR spectrum (between  $\delta$  10-0.5 ppm) of compound **3** in  $\text{CD}_2\text{Cl}_2$

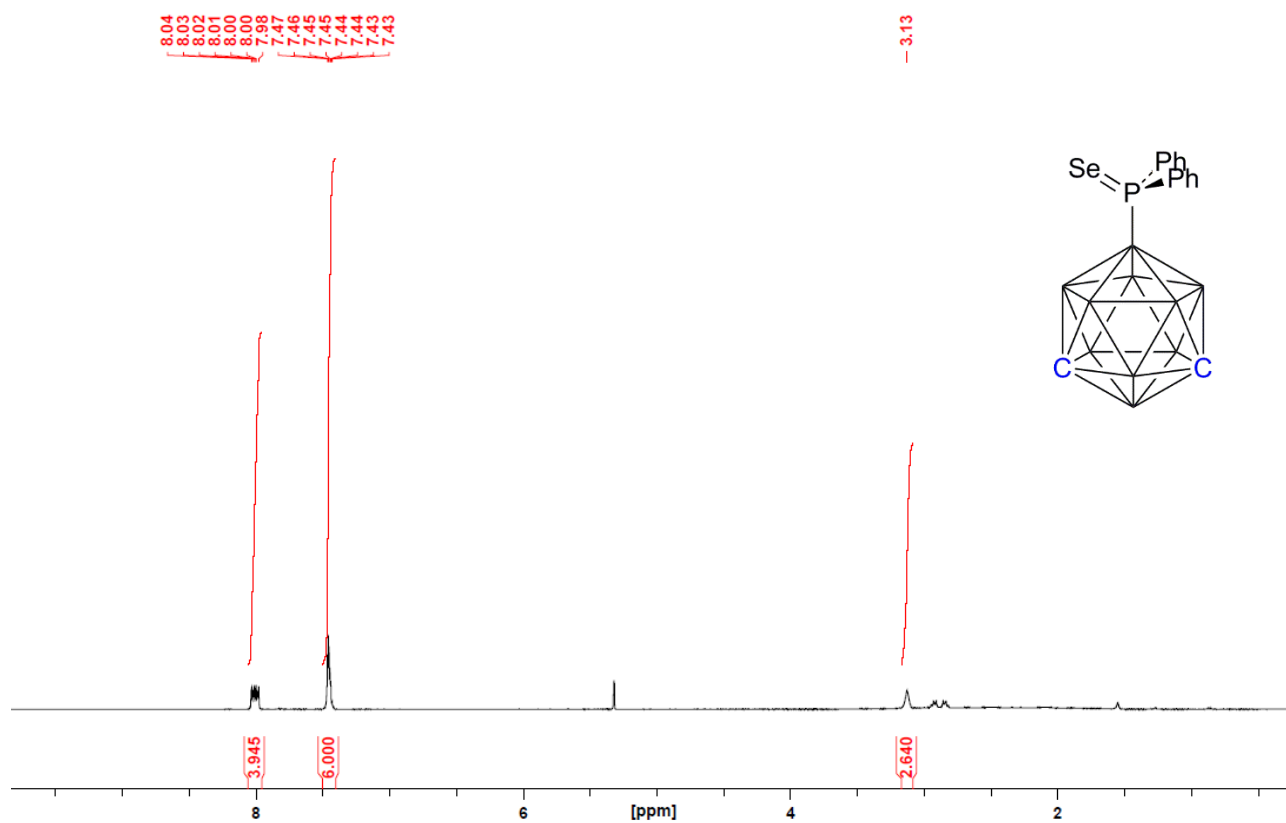

**Figure S15:**  $^1\text{H}$  NMR spectrum (between  $\delta$  8.5-6.5 ppm) of compound **3** in  $\text{CD}_2\text{Cl}_2$

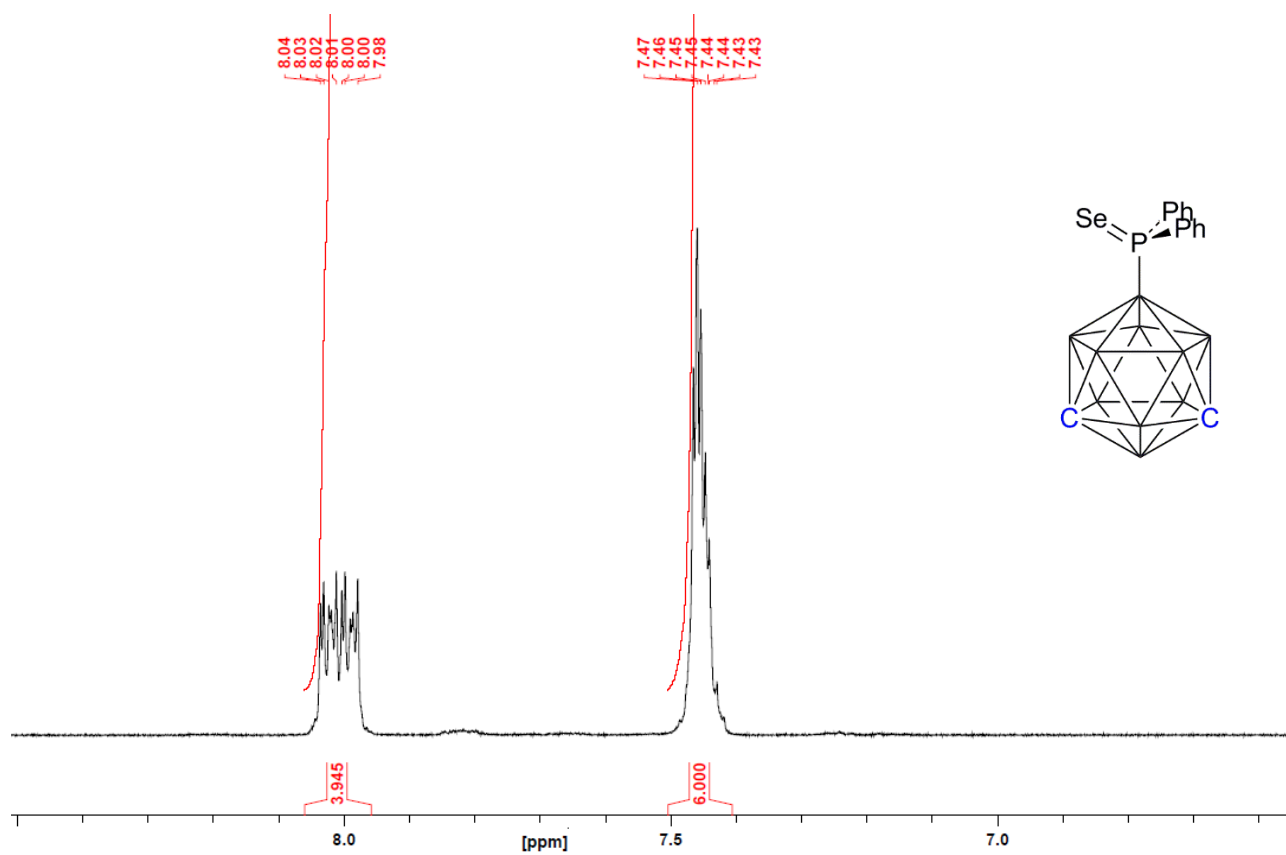

**Figure S16:**  $^{31}\text{P}\{^1\text{H}\}$  NMR spectrum of compound **3** in  $\text{C}_6\text{D}_6$

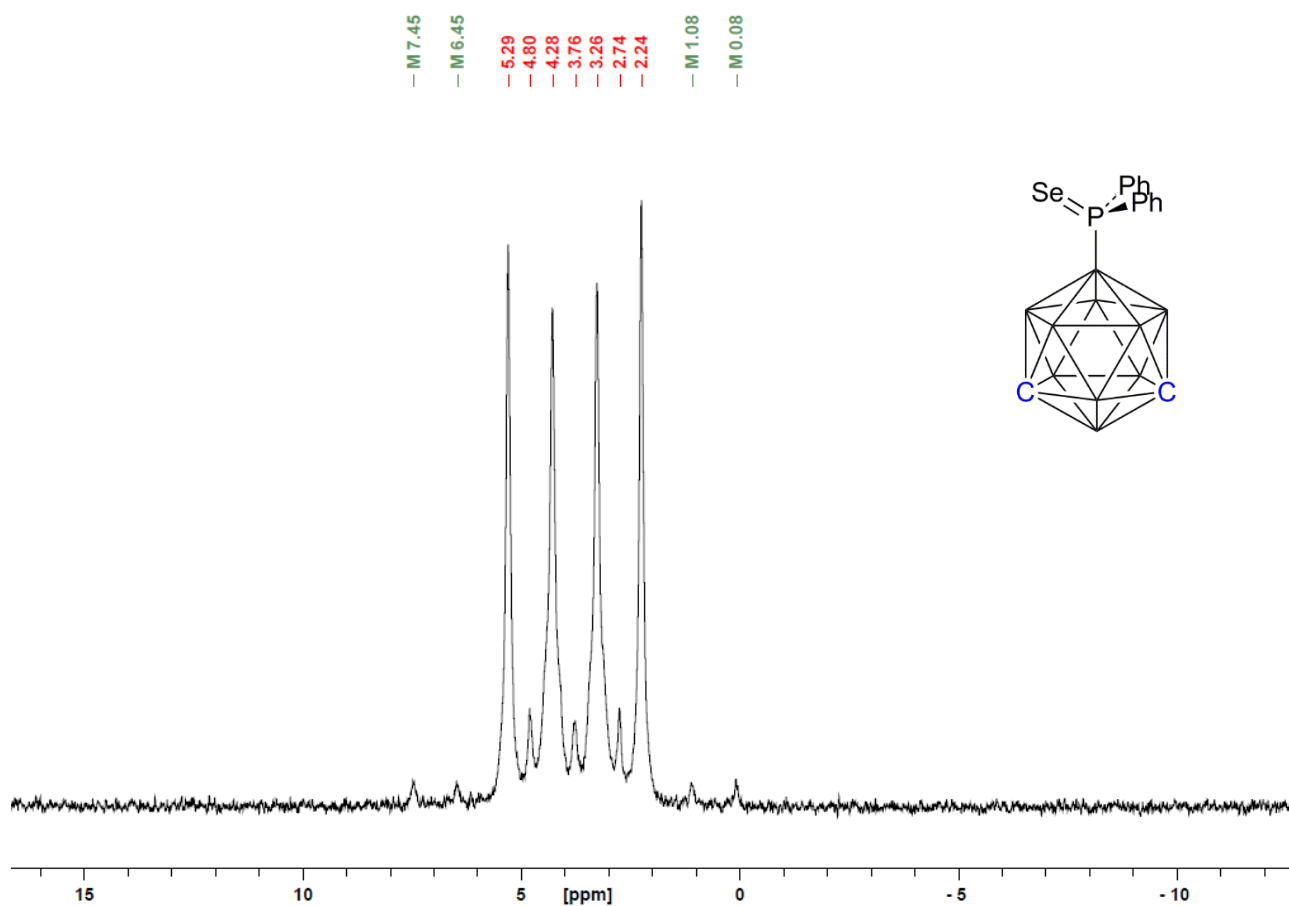

**Figure S17:**  $^{77}\text{Se}$  NMR spectrum of compound **3** in  $\text{C}_6\text{D}_6$

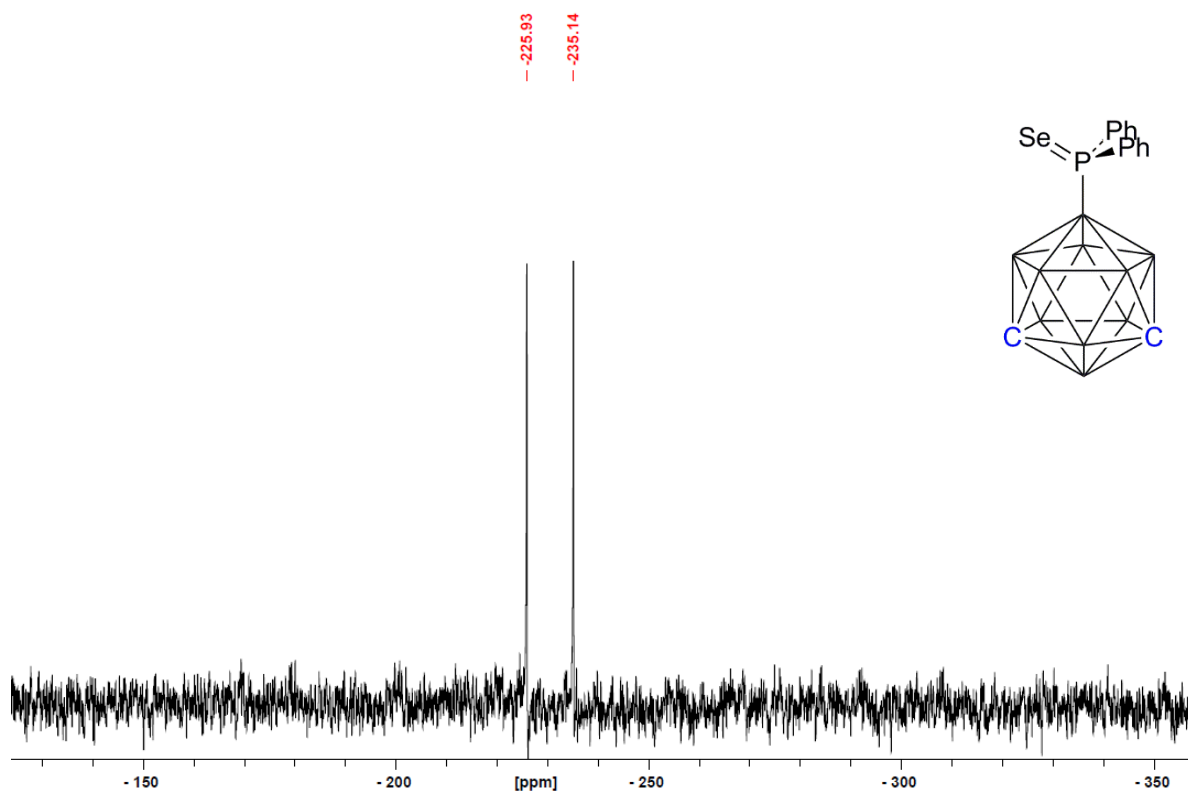

**Figure S18:** EI mass spectrum of compound **3**

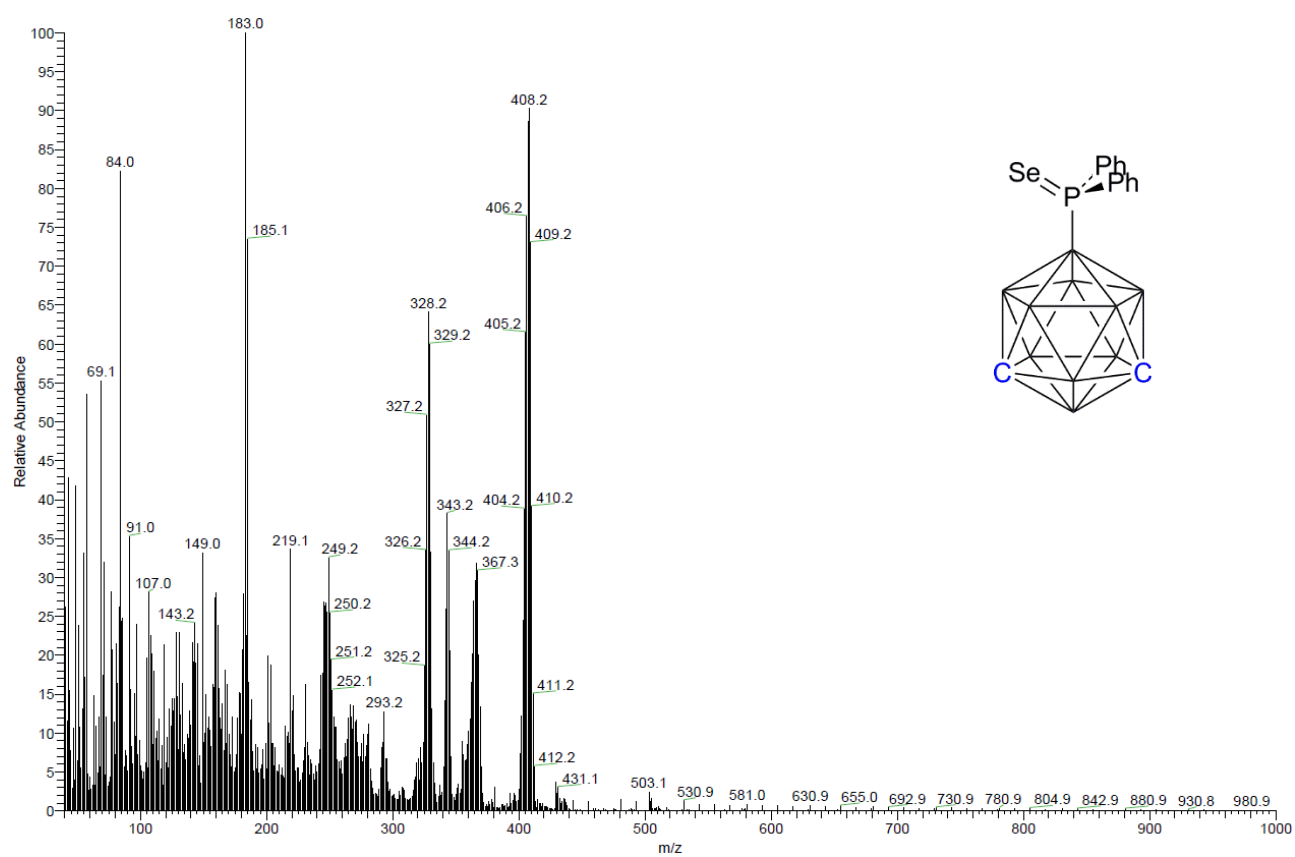

**Figure S19:**  $^1\text{H}$  NMR spectrum (between  $\delta$  9.5-1 ppm) of compound **4** in  $\text{CDCl}_3$

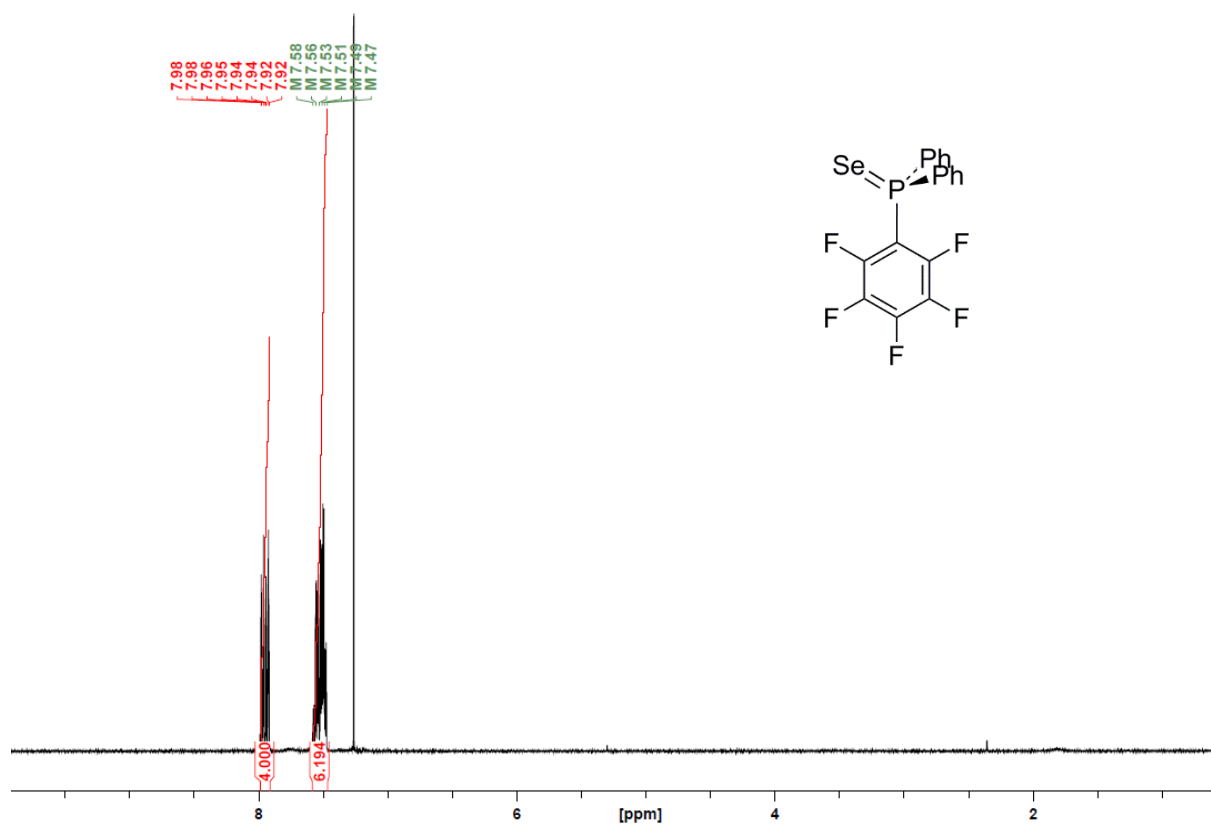

**Figure S20:**  $^1\text{H}$  NMR spectrum (between  $\delta$  8.5-6.9 ppm) of compound **4** in  $\text{CDCl}_3$

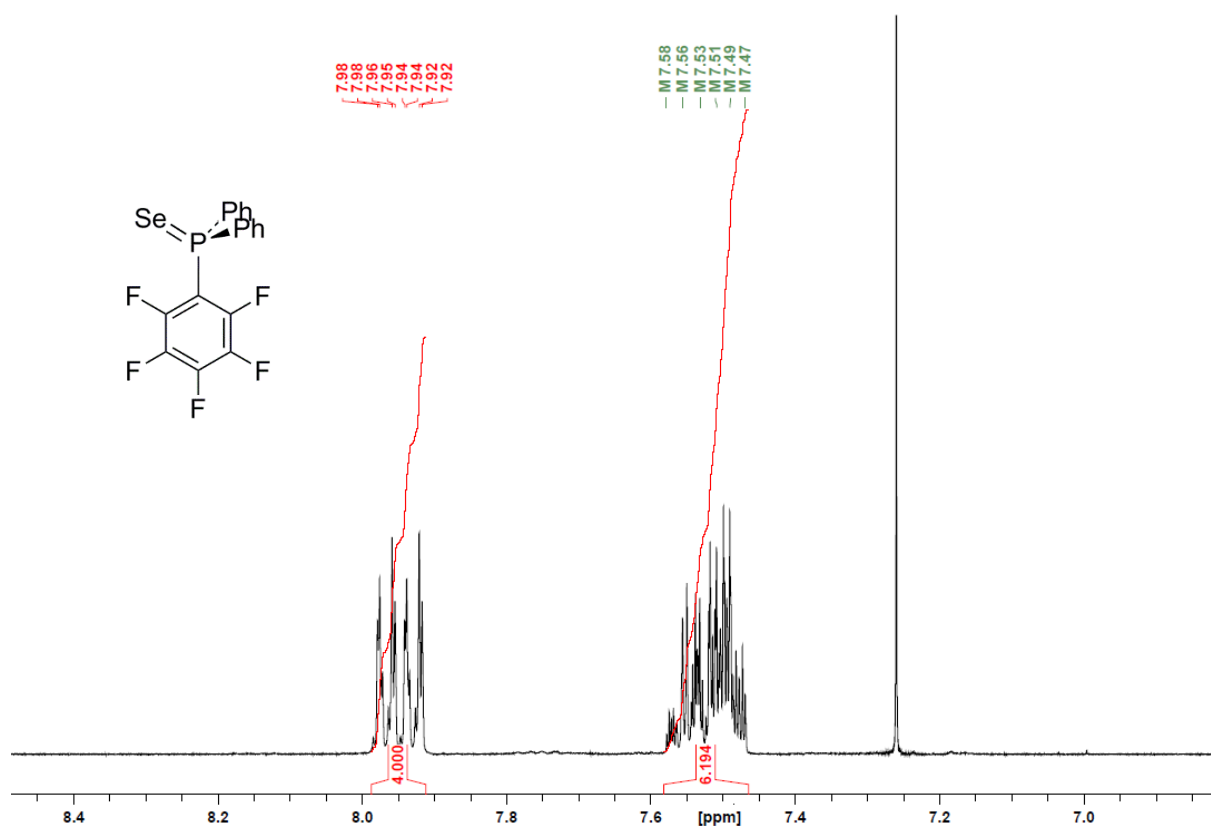

**Figure S21:**  $^{31}\text{P}\{^1\text{H}\}$  NMR spectrum of compound **4** in  $\text{CDCl}_3$

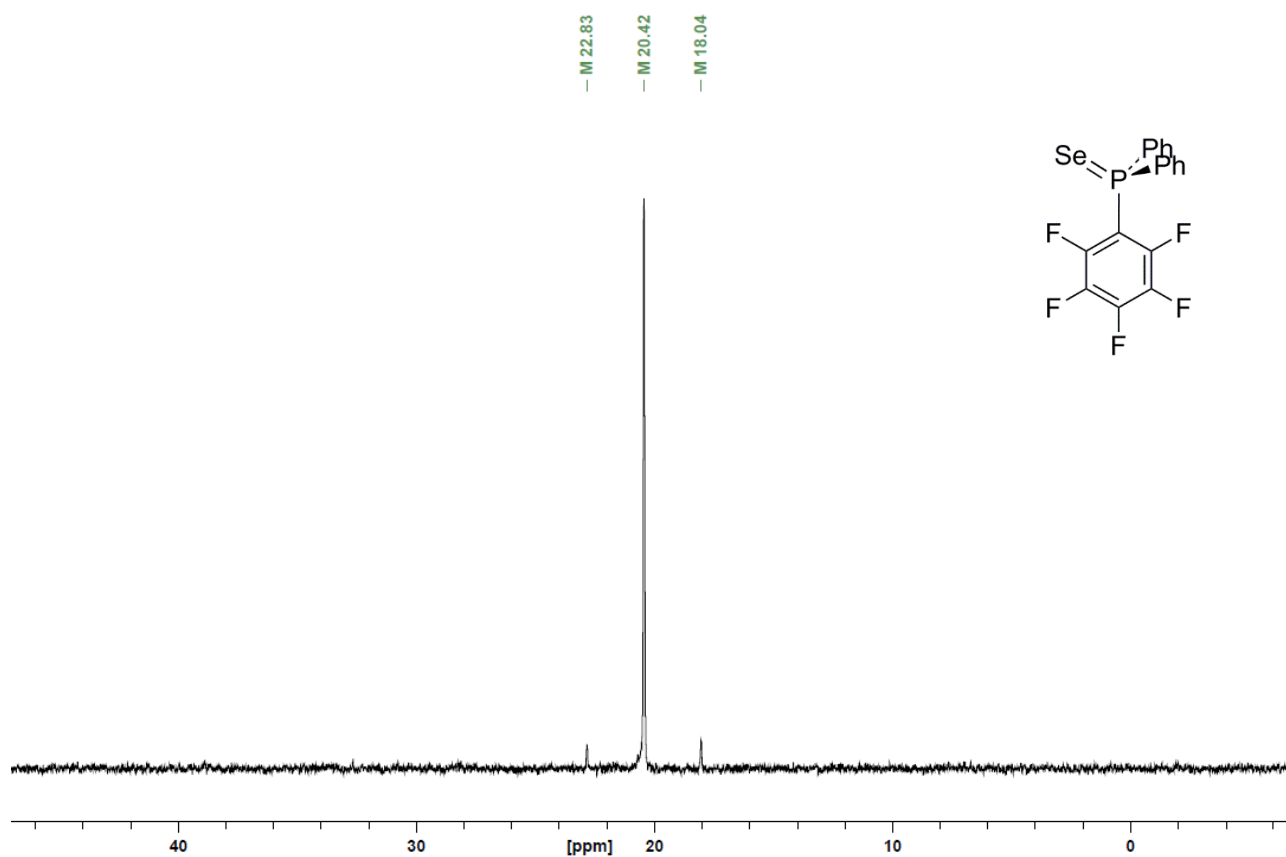

**Figure S22:**  $^{19}\text{F}$  NMR spectrum of compound **4** in  $\text{CDCl}_3$

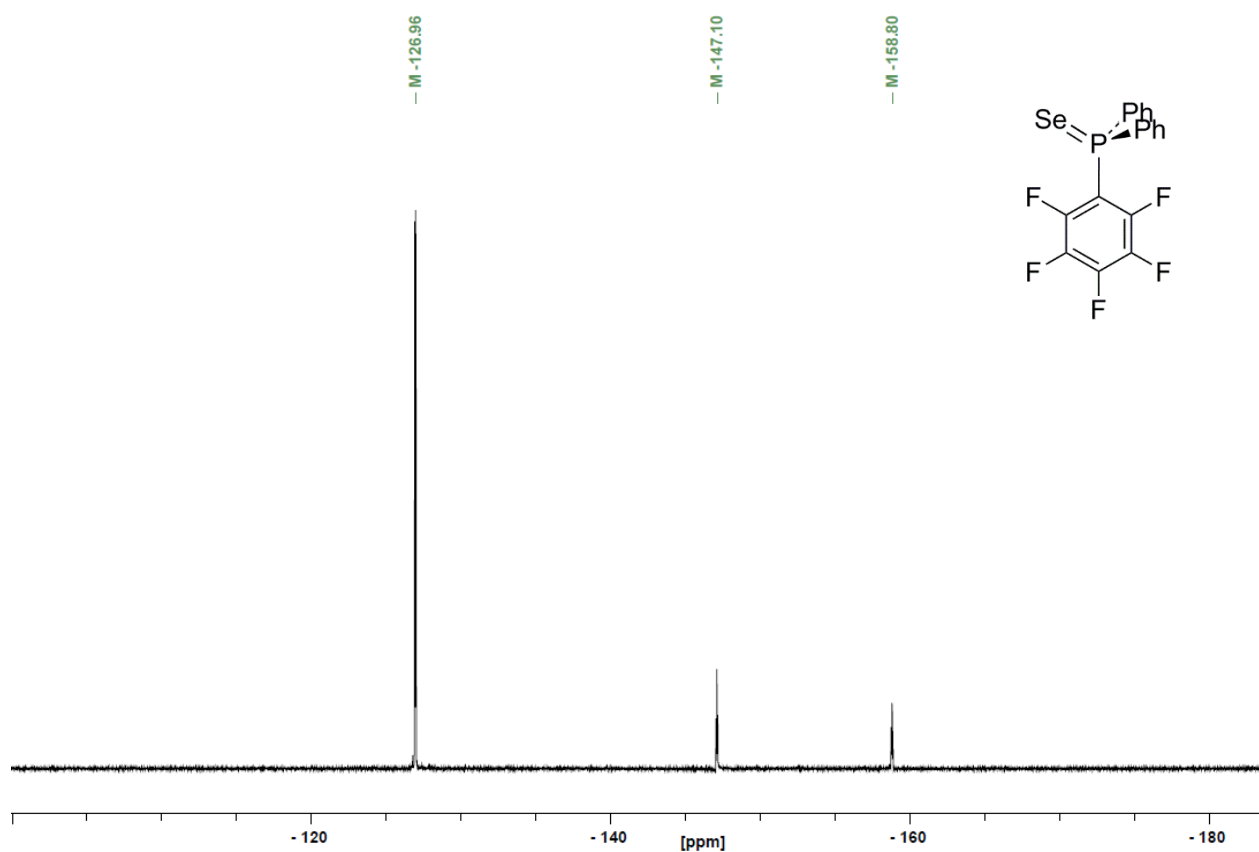

**Figure S23:** EI mass spectrum of compound **4**

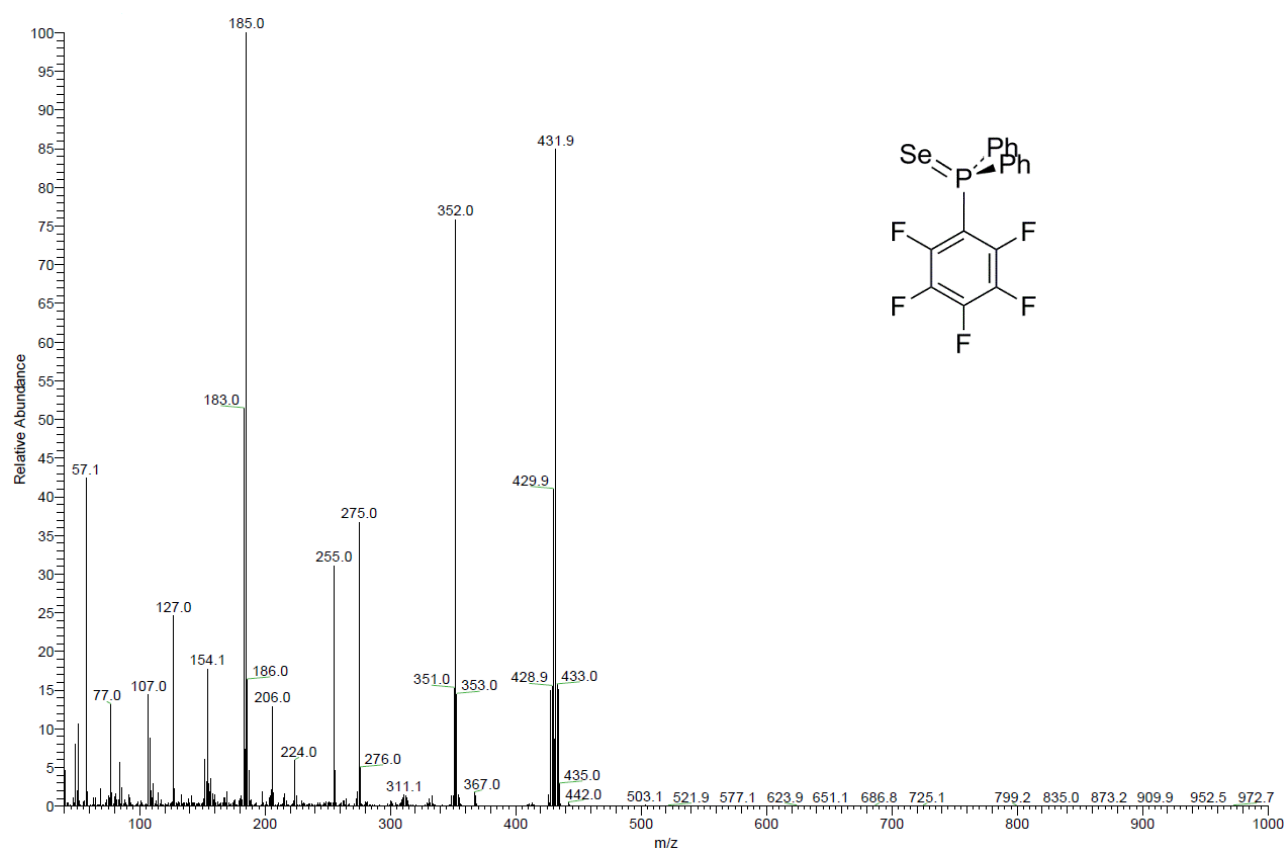

## 2. Catalytic Studies

### 2.1 Michael Addition Reaction

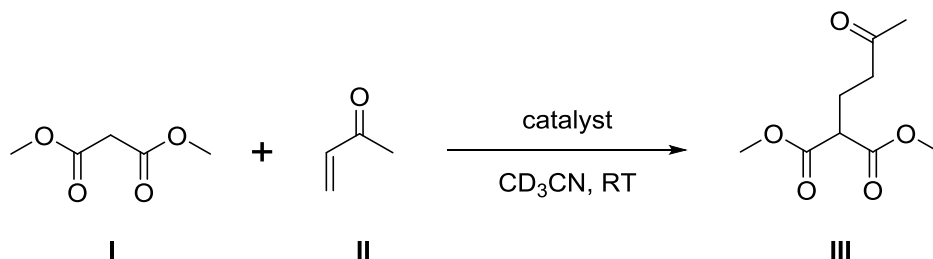

The catalyst (0.04 mmol) was placed in a J. Young NMR tube followed by, in order, dried and degassed CD<sub>3</sub>CN (0.7 mL), dimethylmalonate (I, 0.4 mmol) and methylvinylketone (II, 0.4 mmol). Finally, mesitylene as internal standard (0.2 mmol) was added and the tube sealed and shaken. The reaction was monitored by <sup>1</sup>H NMR spectroscopy every hour, recording the integral of the resonance at δ 2.51 ppm (2H) of the product dimethyl-2-(3-oxobutyl)malonate (III) relative to the integral of the resonance at δ 6.80 ppm (3H) of mesitylene. Results below are the average of two runs.

#### 2.1.1 PPh<sub>3</sub> catalyst

| Hours | Product Integral | % Yield |
|-------|------------------|---------|
| 0.68  | 0.75             | 18.8    |
| 1.72  | 1.14             | 28.6    |
| 2.42  | 1.33             | 33.3    |
| 3.33  | 1.50             | 37.4    |
| 4.28  | 1.64             | 40.9    |
| 5.23  | 1.72             | 43.1    |
| 6.46  | 1.87             | 46.8    |
| 23.65 | 2.57             | 64.3    |

#### 2.1.2 1/PPh<sub>3</sub> catalyst

| Hours | Product Integral | % Yield |
|-------|------------------|---------|
| 0.35  | 0.70             | 17.6    |
| 1.00  | 0.85             | 21.3    |
| 2.83  | 1.63             | 40.8    |
| 4.03  | 1.85             | 46.2    |
| 5.07  | 2.02             | 50.6    |
| 6.02  | 2.25             | 56.1    |
| 23.55 | 3.03             | 75.9    |

#### 2.1.3 V catalyst

| Hours | Product Integral | % Yield |
|-------|------------------|---------|
| 0.12  | 2.06             | 50.2    |
| 1.00  | 3.10             | 77.6    |
| 2.13  | 3.21             | 80.2    |
| 2.98  | 3.25             | 81.3    |
| 4.00  | 3.31             | 82.7    |
| 5.08  | 3.348            | 83.7    |
| 6.10  | 3.400            | 85.0    |
| 23.90 | 3.696            | 92.4    |

## 2.1 Hydrosilylation Reaction

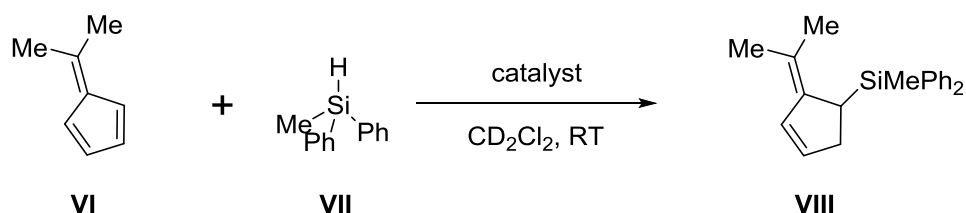

The Lewis base component of the FLP catalyst (0.04 mmol) was placed in a J. Young NMR tube followed by, in order, 6,6-dimethylfulvene (**VI**, 0.4 mmol), methyldiphenylsilane (**VII**, 0.4 mmol) and dry and degassed  $\text{CD}_2\text{Cl}_2$  (0.7 mL). Finally, in the glovebox, the Lewis acid component  $[\text{B}(\text{C}_6\text{F}_5)_3]$ , 0.04 mmol was added and the tube sealed and shaken. The reaction was monitored by  $^1\text{H}$  NMR spectroscopy as soon as possible (this reaction is much quicker than the Michael addition reaction), recording the integral of the resonance at  $\delta$  6.51 ppm (1H) of the product **VIII** relative to the integral of the resonance at  $\delta$  2.35 ppm (9H) of mesitylene. In the case of **IX** the contents of the NMR tube turned immediately deep-red on addition of the Lewis acid, suggesting oligomerization, and no product was detected. Results below are the average of two runs.

| Lewis base                           | Time (/mins) | % Yield |
|--------------------------------------|--------------|---------|
| $\text{PPh}_2(\text{C}_6\text{F}_5)$ | 11           | 89      |
| <b>IVa</b>                           | 12           | 88      |
| <b>V</b>                             | 26           | 80      |
| <b>IX</b>                            | -            | 0       |
